# Supplementary material for: Crumbling cliffs and intergenerational cohesivity: A new climate praxis model for engaged community action on accelerated coastal change
Source: Copernicus journal article supplement (doi:10.5194/egusphere-2024-4085), 2025-01-23
Supplement: Supplementary file [file egusphere-2024-4085-AC1-supplement.pdf]

### Reviewer 1:

- I appreciated reading this paper, which tells a compelling and timely story about an action research project engaging disadvantaged young people in a coastal UK community. The authors have clearly undertaken a thoughtful, locally rooted project that addresses the urgent need for more inclusive forms of climate communication and education. The narrative is engaging, and the topic is relevant to diverse readerships. However, I believe that in its current form, the paper does not yet meet the standards of scientific rigour, theoretical grounding, and methodological clarity expected by a peer-reviewed journal. Major revisions are required for it to constitute a publishable scientific contribution. Below, I detail both key concerns and recommendations, structured to reflect the journal's evaluation framework.

>> We thank the reviewer for such a thoughtful and supportive critique of our work noting the timeliness, thoughtfulness and compelling place-based elements of our project. We thank the reviewer for the supportive comments on including highlighting areas for suggested improvements as well as helpful recommendations. We sought to tell the story of the work – given the Journal's ethos - but have added in a little more structure to the narrative in response to the reviewers suggestions. We respond to the specific suggestions inline below, noting the changes made to the manuscript.

**Scientific Significance:** The manuscript presents a meaningful case study and offers a potentially valuable contribution in the form of the “new climate praxis model.” However, the theoretical and conceptual development of this model is not adequately established; the paper lacks clarity on how it advances the existing state of knowledge on the topic, particularly within the domains of climate literacy, participatory education, or community-based climate action, and how the model builds upon such literature. While the project is potentially original in its practice, the paper currently reads more as a descriptive – and engaging - account of an experience than a critical analysis of a topic, offering new conceptual tools, methods, or generalisable insights for future research and practice on the topic. Also, terms like “intergenerational dialogues,” “creative methodologies,” and “transformative potential” are used loosely and need clearer definitions, theoretical anchoring, and evidentiary support.

>> We have added an additional paragraph to a now extended introduction to capture the theoretical and conceptual development of the new praxis model and how this links to an extends elements of climate literacy, participatory education, and community-based climate action. This section reads: *“The work reported herein also reports on the outcomes from a methodological development perspective where a new climate praxis education model evolves and is refined from the engagements. The new model builds directly on established traditions in participatory action research (PAR; Cornish et al., 2023) and Freirean (Freire, 1970) critical pedagogy, advancing them in the specific context of climate literacy and community-based climate action with marginalised youth. The model is grounded in a critical engagement with theories of knowledge co-production, knowledge democracy (Duncan-Andrade and Morrell, 2008; Chapman, 2019; Stern, 2019), and communities of practice (Lave & Wenger, 1991), contributing conceptual advances through integrating rights-based climate education with storytelling as a method of participatory inquiry and intergenerational dialogues. Similarly, the creative methodologies serve as tools of knowledge mobilisation and repositions youth as legitimate knowledge producers and policy actors, thus offering a replicable approach to community-led*

*climate resilience that has already begun influencing local practices and responses. In this way, the model offers both theoretical and practical advancements in participatory climate education, positioning it as a new conceptual tool for future research and action. Herein we report and detail the approaches adopted within the programme and critically evaluate the methodologies employed. We highlight the outcomes from the activities and critically discuss the implications for climate change education, using the climate praxis model as a template for border geoscience communication within the context of a disadvantaged, at risk, coastal community."*

## Scientific Quality

Several areas of the paper would benefit from improved methodological transparency and conceptual clarity:

- **Literature/theory integration:** The current literature is concentrated in the introduction and lacks a dedicated section clarifying key debates in climate education, youth engagement, or critical pedagogies. This weakens the paper's ability to make a clear and evidenced claim about its knowledge contribution. A focused literature review and stronger conceptual grounding – linking contemporary climate education debates with Freire's critical pedagogies theory - are urgently needed.

>> The extended introduction above also directly addresses this point linking Freire's critical pedagogies theory to contemporary climate education.

- **Conceptual clarity:** Terms such as "intergenerational dialogue" are not clearly justified or demonstrated in the empirical material. Since the project centres on year-eight students, it is not apparent in what way intergenerational exchange was achieved. Was the creative material from the community integrated in the sessions? Did the youth engage directly with elders at some point? These elements need to be clarified.

>> A sentence has been added to clarify this element of the work. We thank the reviewer for highlighting this as we note we implied rather than explained this. The sentence reads: Line 91: *"build intergenerational dialogues (from children to senior members of the community) concerning climate change"* And Line 225: *"Finally, we set them the task of going out to find stories from their local community, family and friends and start to think of how they could best represent that story and build intergenerational dialogues into the data collection."*

- **Methodological rigour:** The methods section does offer helpful detail on the sessions and activities undertaken with students, but it lacks critical information on:
  - o **Sampling:** Why this age group? How were students selected? Were there any limitations emerging from this sample?
  - o **Data sources:** What exactly is being analysed in the paper? Is this an analysis of the methods, the participants' outputs, or the overall process/methodology?
  - o **Analytical strategy:** Are statements (e.g., "students did not perceive climate change as a risk to their community") based solely on outputs such as word clouds and maps? Were transcripts, field notes, or recordings used to support

interpretation? Clarification is needed on how claims were derived and what data supported them.

>> We have added in these elements of the methodology, which were not included to save space. We have also clarified the data sources as well as the analytical strategies employed. This section now reads: Line 140: *"The work reported herein evolved from this framework and the recruitment of the class was through the existing relationship with the school."* And Line 145: *"Session transcripts were recorded alongside session notes for onward analysis and to support later interpretations."*

- **Use of references:** Some citations are used imprecisely or overly broadly (e.g., at some point Freire is cited as if he created the "new climate praxis model," rather than the authors building upon his ideas). Greater care is needed in situating this work within—not merely citing—the theoretical literature.

>> We found the Freire reference and we have altered the text to cover this point but could not find other examples suggested by the reviewer. Nonetheless we have checked through the work and tested the assumed links to the theoretical literature. Moreover, in response to RC2, we have added in additional paragraphs to the discussion to link more fully back to the theoretical literature. Line 385: *"The work through the series of workshops and engagements has effectively developed and deployed a methodology that can be best represented as a new climate praxis model based on Freirean theory (Freire, 1970). This model builds a knowledge (gain), exploration (play) and action (Figure 7) framework, which combined connectivity to an environmental issue (coastal change) through to adaptation."*

- **Presentation Quality:** The manuscript is engaging but needs clearer structure and focus to guide the reader through the research story:

>> We thank the reviewer for these kind words of encouragement. We sought to tell the story of the work – given the Journal's ethos, but have added in a little more structure to the narrative in response to the reviewers suggestions. For example we have added a new section 2.3 on the workshops and the PAR theory – again to help signpost. This now reads: **"2.3 PAR Sessions** - Six PAR sessions were run, each with a specific focus. The first session addressed the background interaction and introduced us to the class. We also explored the meaning of community and the young people's view of their place within this. The purpose of this exploration of place was central in grounding the young people to explore their sense of what place meant to them and incorporate their own lived experience...."

- **Introduction:** Overly long and lacks a clear funnel from problem → gap → contribution → research aim → structure of the paper.

>> The introduction is longer as a result of the changes made, but we have added in sub-sections loosely following that suggested. Which we think addresses this need. This includes a new section on Climate Praxis.

- **Findings:** Results are described chronologically and narratively, which is compelling, but they need to be more analytically unpacked. For instance, the claim that students developed a deeper understanding of climate risks should be substantiated with clear evidence (e.g., comparison between baseline and post-questionnaires, direct quotes, etc.).

>> We have added in this detail as requested into the results section, including the additional quotes to justify the findings. See lines 260 onwards. Additionally the word clouds are direct quotes from the questionnaire and this has been made clear in the Figure title.

- **Language and terminology:** The paper uses accessible language, but at times imprecise or vague terms (e.g., “creative,” “transformative”) are left undefined.

>> We are not clear that these terms are poorly defined. We have chosen to retain their use as is in the paper to ensure that it continues to use accessible language, following the ethos of the journal.

## Recommendations for Revision

To strengthen the manuscript, I suggest the following:

**Rework the introduction** to provide a clear and structured argument: define the problem, establish the knowledge gap, state the contribution, describe the methods briefly, and outline the structure of the paper.

>> The introduction is reworked, as suggested, with sub-sections included as outlined above.

## Add a dedicated literature/conceptual section:

- Map key debates in climate education, especially with disadvantaged youth.

>> This is added into the extended introduction rather than a new conceptual section suggested, but as a sub-section at the end of the introduction.

- Understand the key concepts that the paper builds upon and clarify what they mean: “intergenerational dialogue,” “creative climate engagement,” and “transformative education,” using scholarly sources. I personally do not think this paper is about “intergenerational dialogues”, but I could be wrong. A clearer explanation would help.

>> We have tightened up the use of terms through qualification and the addition of citations to guide the theoretical interests, including in the new section in the introduction.

- Discuss the foundations of the “climate literacy-based approach” and how your model builds upon (or diverges from) this.

>> This is added in the discussion section, with additional links back to Freire and the theoretical constructs of the work. This section (Line 395) now reads: “*Reflecting on how this progressed through the methodology and the results, it is evident that this advanced through a double looping learning process and journey (Trajber et al., 2019), where a reflective approach within the cohort enabled participants to gain knowledge and understanding, explore and widen their perspectives through to beginning to act on coastal change within their broader community. In effect the work extends a climate literacy-based approach that seeks to enable students to become active participants and ensuring they are best prepared for the challenges that they face into the future with the knowledge to enable them to consider and derive potential solutions (Lawson et al, 2018; Hügel and Davies, 2020). Additionally, the interfaces between the principal components include looping and reflexivity, essentially involving each of the participants transiting their own “wave of change” (Jones et al. 2021). There is evidence in their journey as individuals and a collective of macro-level looping, where additional reflection leads to deeper knowledge, enhanced engagement and results in amplified action (Figure 7). “*
